# Supplementary material for: Lyme Borreliosis and Associations With Mental Disorders and Suicidal Behavior: A Nationwide Danish Cohort Study
Source: Atypon-hosted journal article supplement (doi:10.1176/appi.ajp.2021.20091347), 2021-07-28
Supplement: appi.ajp.2020.20091347.ds001.pdf [file appi.ajp.2020.20091347.ds001.pdf]

## **CONTENTS**

Table S1. Classification and frequency of Lyme borreliosis diagnoses

Table S2. Number of individuals with mental disorders, person-years, and rates of mental disorders by socio-demographic and health-related variables in individuals with and without Lyme borreliosis, respectively.

Table S3. Number of people with Lyme Borreliosis and any mental disorder, affective disorders, suicide attempt or suicide according to disease category, basic and fully adjusted incidence rate ratios.

Table S4. Number of individuals with Lyme borreliosis and basic and fully adjusted incidence rate ratios for all 4 outcomes, respectively, including individuals with a history of mental disorders or suicide attempt before 1994

Table S5. Number of Individuals with Lyme borreliosis and basic and adjusted incidence rate ratios for non-CNS fractures

**TABLE S1. Classification and frequency of Lyme disease/Lyme borreliosis diagnoses\***

| <b>ICD-10 codes for Lyme disease/Lyme borreliosis</b> | <b>n</b> |
|-------------------------------------------------------|----------|
| <b><i>Lyme general &amp; other non- neuro</i></b>     |          |
| DA692 Lyme's disease                                  | 12141    |
| DA 692A Borrelia acrodermatitis                       | 238      |
| DA692B Borrelia arthritis                             | 96       |
| DA692C Borrelia carditis                              | 23       |
| DA692E Borreliosis                                    | 1464     |
| DA692F Erythema chronicum migrans (Borrelia)          | 1284     |
| DM012 Arthritis by Borrelia infection                 | 303      |
| DM012A Arthritis, Lyme's disease                      | 14       |
| <b><i>Lyme neuro other</i></b>                        |          |
| DA692D Borrelia polyradiculitis                       | 860      |
| DA692G Polyradiculitis by a Borrelia infection        | 138      |
| DG360K Polyneuropathia, Lyme's disease                | 9        |
| <b><i>Meningitis</i></b>                              |          |
| DG019J Meningitis, Lyme's disease                     | 360      |

\* Individuals could be registered with more than one diagnosis therefore the number of diagnoses exceeds the number of individuals in the study.

**TABLE S2. Number of individuals with mental disorders, person-years, and rates of mental disorders by socio-demographic and health-related variables in individuals with and without Lyme borreliosis, respectively**

| Characteristics             | No Lyme borreliosis |              |                                     | Lyme borreliosis |              |                         |
|-----------------------------|---------------------|--------------|-------------------------------------|------------------|--------------|-------------------------|
|                             | n                   | person-years | IR per 100,000 person-years (95%CI) | n                | person-years | IR per 100,000 (95% CI) |
| <b>Total</b>                | 633973              | 111839450    | 567 (565-568)                       | 831              | 113426       | 733 (683-782)           |
| <i>Gender</i>               |                     |              |                                     |                  |              |                         |
| Male                        | 293519              | 55738932     | 527 (525-529)                       | 405              | 59188        | 684 (618-751)           |
| Female                      | 340454              | 56100518     | 607 (605-609)                       | 426              | 54237        | 785 (711-860)           |
| <i>Marital status</i>       |                     |              |                                     |                  |              |                         |
| Never married               | 318791              | 45690600     | 698 (695-700)                       | 447              | 45417        | 984 (893-1,075)         |
| Married/reg. Partner        | 167755              | 46615851     | 360 (358-362)                       | 264              | 52025        | 507 (446-569)           |
| Divorced                    | 54458               | 7877818      | 691 (685-697)                       | 58               | 8196         | 708 (526-890)           |
| Widowed                     | 60721               | 6616589      | 918 (910-925)                       | 33               | 4267         | 773 (509-1,037)         |
| Unknown status              | 32248               | 5038592      | 640 (633-647)                       | 29               | 3521         | 824 (524-1,123)         |
| <i>Educational level</i>    |                     |              |                                     |                  |              |                         |
| Elementary school           | 253899              | 31787685     | 799 (796-802)                       | 204              | 23521        | 867 (748-986)           |
| Vocational training         | 120947              | 29623999     | 408 (406-411)                       | 152              | 27097        | 561 (472-650)           |
| High school                 | 42813               | 7089679      | 604 (598-610)                       | 45               | 5276         | 853 (604-1,102)         |
| University degree           | 71295               | 20185163     | 353 (351-356)                       | 141              | 27016        | 522 (436-608)           |
| missing                     | 145019              | 23152924     | 626 (623-630)                       | 289              | 30516        | 947 (838-1,056)         |
| <i>Socioeconomic status</i> |                     |              |                                     |                  |              |                         |
| Working                     | 175458              | 55227868     | 318 (316-319)                       | 282              | 55846        | 505 (446-564)           |
| Unemployed                  | 79057               | 3934009      | 2,010 (1,996-2,024)                 | 49               | 3102         | 1,579 (1,137-2,022)     |
| Disability pension          | 32791               | 3571467      | 918 (908-928)                       | 26               | 2801         | 928 (571-1,285)         |
| Retired/Early retirement    | 127864              | 19488707     | 656 (652-660)                       | 122              | 16199        | 753 (619-887)           |
| Under education             | 76979               | 8304922      | 927 (920-933)                       | 54               | 4066         | 1,328 (974-1,682)       |
| Under age or other          | 60920               | 7666743      | 795 (788-801)                       | 90               | 6732         | 1,337 (1,061-1,613)     |
| Missing                     | 80904               | 13645735     | 593 (589-597)                       | 208              | 24679        | 843 (728-957)           |
| <i>Charlson comorbidity</i> |                     |              |                                     |                  |              |                         |
| 0                           | 509500              | 97243723     | 524 (523-525)                       | 696              | 100442       | 693 (641-744)           |
| 1                           | 77198               | 8707145      | 887 (880-893)                       | 99               | 8635         | 1,146 (921-1,372)       |
| 2 +                         | 47275               | 5888582      | 803 (796-810)                       | 36               | 4349         | 828 (557-1,098)         |

**TABLE S3. Number of people with Lyme borreliosis and any mental disorder, affective disorders, suicide attempt or suicide according to Lyme borreliosis category, basic and fully adjusted incidence rate ratios**

| Characteristics                                                 | Cases with psychiatric diagnosis | IR per 100000 pyrs | 95% CI    | Basic adjusted IRR <sup>1</sup> | 95% CI     | Fully adjusted IRR <sup>2</sup> | 95% CI    |
|-----------------------------------------------------------------|----------------------------------|--------------------|-----------|---------------------------------|------------|---------------------------------|-----------|
| <b>Any psychiatric diagnosis</b>                                |                                  |                    |           |                                 |            |                                 |           |
| <b>Lyme borreliosis category</b>                                |                                  |                    |           |                                 |            |                                 |           |
| No Lyme                                                         | 633973                           | 567                | 565-568   | 1                               |            | 1                               | 1         |
| Lyme general <sup>4</sup>                                       | 773                              | 731                | 679-782   | 1.20                            | 1.11-1.28  | 1.29                            | 1.20-1.38 |
| Lyme neuro <sup>5</sup>                                         | 29                               | 684                | 435-934   | 1.05                            | 0.73-1.51  | 1.17                            | 0.81-1.69 |
| Lyme meningitis                                                 | 29                               | 858                | 545-1,170 | 1.25                            | 0.87-1.79  | 1.18                            | 0.82-1.70 |
| <b>Affective disorders</b>                                      |                                  |                    |           |                                 |            |                                 |           |
| <b>Lyme borreliosis category</b>                                |                                  |                    |           |                                 |            |                                 |           |
| No Lyme                                                         | 218358                           | 189                | 189-190   | 1                               |            | 1                               | 1         |
| Lyme general <sup>4</sup>                                       | 305                              | 275                | 244-305   | 1.26                            | 1.12-1.41  | 1.43                            | 1.28-1.60 |
| Lyme neuro <sup>5</sup>                                         | 13                               | 295                | 135-455   | 1.19                            | 0.69-2.04  | 1.33                            | 0.78-2.30 |
| Lyme meningitis                                                 | 6                                | 169                | 34-304    | 0.78                            | 0.35-1.73  | 1.21                            | 0.54-2.70 |
| <b>Suicide attempt<sup>3</sup></b>                              |                                  |                    |           |                                 |            |                                 |           |
| <b>Lyme borreliosis category combining neuro and meningitis</b> |                                  |                    |           |                                 |            |                                 |           |
| No Lyme                                                         | 58144                            | 50                 | 50-50     | 1                               |            | 1                               | 1         |
| - Lyme general <sup>4</sup>                                     | 62                               | 45                 | 41-68     | 1.20                            | 0.94-1.54  | 1.98                            | 1.54-2.54 |
| - Lyme neuro <sup>5</sup> or meningitis                         | 5                                | 59                 | 8-116     | 1.18                            | 0.49-2.85  | 2.40                            | 1.00-5.77 |
| <b>Suicide</b>                                                  |                                  |                    |           |                                 |            |                                 |           |
| <b>Lyme borreliosis category</b>                                |                                  |                    |           |                                 |            |                                 |           |
| No Lyme                                                         | 12644                            | 11                 | 11-11     | 1                               |            |                                 | na        |
| Lyme general <sup>4</sup>                                       | 21                               | 18                 | 11-26     | 1.56                            | 1.01-2.39  |                                 | na        |
| Lyme neuro <sup>5</sup>                                         | 4                                | 49                 | 1-97      | 4.86                            | 1.82-12.94 |                                 | na        |
| Lyme meningitis                                                 | 0                                | na                 | na        | na                              | na         |                                 | na        |

<sup>1</sup>Basic adjusted: adjusted for sex, age and calendar period.

<sup>2</sup>Fully adjusted: adjusted for sex, age and calendar period, educational level, socio-economic status, civil status, Charlson comorbidity index.

<sup>3</sup>Also adjusted for pre-Lyme psychiatric disorders.

<sup>4</sup>Lyme general" refers to all non-neurologic diagnoses of Lyme disease.

<sup>5</sup>Lyme neuro refers to all neurologic codes other than the code for meningitis.

Abbreviation: IR= Incidence Rate; IRR = Incidence Rate Ratio

**TABLE S4. Number of individuals with Lyme borreliosis and basic and fully adjusted incidence rate ratios for all 4 outcomes, respectively, including individuals with a history of mental disorders or suicide attempt before 1994**

| Characteristics                      | Cases  | IR per 100000 person-years | 95% CI  | Basic adjusted IRR <sup>1</sup> | 95% CI    | Fully adjusted IRR <sup>2</sup> | 95% CI    |
|--------------------------------------|--------|----------------------------|---------|---------------------------------|-----------|---------------------------------|-----------|
| Outcome Mental disorders             |        |                            |         |                                 |           |                                 |           |
| No Lyme                              | 720368 | 630                        | 629-631 | 1                               |           | 1                               |           |
| Lyme borreliosis                     | 884    | 763                        | 713-814 | 1.16                            | 1.09-1.25 | 1.26                            | 1.18-1.35 |
| Outcome Affective disorders          |        |                            |         |                                 |           |                                 |           |
| No Lyme                              | 255123 | 215                        | 215-216 | 1                               |           | 1                               |           |
| Lyme borreliosis                     | 358    | 293                        | 263-324 | 1.22                            | 1.10-1.35 | 1.37                            | 1.24-1.52 |
| Outcome Suicide attempt <sup>3</sup> |        |                            |         |                                 |           |                                 |           |
| No Lyme                              | 71711  | 60                         | 59-60   | 1                               |           | 1                               |           |
| Lyme borreliosis                     | 72     | 58                         | 44-71   | 1.1                             | 0.87-1.38 | 1.64                            | 1.30-2.06 |
| Outcome Suicide                      |        |                            |         |                                 |           |                                 |           |
| No Lyme                              | 16083  | 13                         | 13-14   | 1                               |           | na                              | na        |
| Lyme borreliosis                     | 28     | 22                         | 14-31   | 1.74                            | 1.18-2.58 | na                              | na        |

<sup>1</sup>Basic adjusted: adjusted for sex, age and calendar period.

<sup>2</sup>Fully adjusted: adjusted for sex, age and calendar period, educational level, socio-economic status, civil status, Charlson comorbidity index.

<sup>3</sup>Also adjusted for pre-Lyme psychiatric disorders.

**TABLE S5. Number of individuals with Lyme borreliosis and basic and fully adjusted incidence rate ratios for non-CNS fractures<sup>3</sup>**

| Characteristics     | Cases   | IR per 100000 person-years | 95% CI    | Basic adjusted IRR <sup>1</sup> | 95% CI    | Fully adjusted IRR <sup>2</sup> | 95% CI    |
|---------------------|---------|----------------------------|-----------|---------------------------------|-----------|---------------------------------|-----------|
| No Lyme borreliosis | 1659699 | 1650                       | 1648-1653 | 1                               |           | 1                               |           |
| Lyme borreliosis    | 1751    | 1813                       | 1728-1898 | 1.13                            | 1.07-1.18 | 1.14                            | 1.09-1.20 |

<sup>1</sup>Basic adjusted: adjusted for sex, age and calendar period

<sup>2</sup>Fully adjusted: adjusted for sex, age and calendar period, educational level, socio-economic status, civil status and Charlson comorbidity index.

<sup>3</sup>ICD-10 codes for non-CNS fractures: S12.8A-S12.8D, S22.2-S22.5, S22.8, S22.9, S32.3-S32.5, S42.0-S42.7, S52.0-S52.9, S62.0-S62.8, S72.0-S72.4, S72.7-S72.9, S82.0-S82.9, S92.0-S92.5, S92.7, S92.9, T10, T12.

Abbreviations: IR= Incidence Rate; IRR = Incidence Rate Ratio
